# Supplementary material for: Relationship between Preoperative Pyuria and Bacille Calmette-Guerin Treatment in Intravesical Recurrence after Transurethral Resection of High-Risk, Non-Muscle Invasive, Bladder Carcinoma: A Retrospective Study of Human Data
Source: MDPI journal article supplement (doi:10.3390/cancers15061638), 2023-03-07
Supplement: s1 [file s1]

# Supplementary Materials: Relationship between preoperative pyuria and bacille Calmette-Guerin treatment in intravesical recurrence after transurethral resection of high-risk, non-muscle invasive, bladder carcinoma: A retrospective study of human data

Ryo Tsukamoto, Tomokazu Sazuka, Yoshinori Hattori, Hiroaki Sato, Takayuki Arai, Yusuke Goto, Yusuke Imamura, Shinichi Sakamoto and Tomohiko Ichikawa

**Table S1.** BCG treated patients subdivided according to the presence of preoperative pyuria.

|                             |              | <b>Total<br/>n=179</b> | <b>Pyuria present<br/>(n=45)</b> | <b>Pyuria absent<br/>(n=134)</b> | <b>P-value</b> |
|-----------------------------|--------------|------------------------|----------------------------------|----------------------------------|----------------|
| Age                         | Mean (range) | 73(38-89)              | 75(56-89)                        | 73(38-87)                        | 0.0841         |
| Sex                         | Male         | 141(78.8)              | 35(77.8)                         | 106(79.1)                        | 0.8506         |
|                             | Female       | 38(21.2)               | 10(22.2)                         | 28(20.9)                         |                |
| Preoperative cytology       | Positive     | 55(30.7)               | 16(35.6)                         | 39(29.1)                         | 0.417          |
|                             | Negative     | 124(69.3)              | 29(64.4)                         | 95(70.9)                         |                |
| Grade                       | High         | 160(89.4)              | 39(86.7)                         | 121(90.3)                        | 0.4938         |
|                             | Low          | 19(10.6)               | 6(13.3)                          | 13(9.7)                          |                |
| Pathological T stage, n (%) | T1           | 64(35.8)               | 20(44.4)                         | 44(32.8)                         | 0.1598         |
|                             | Others       | 115(64.2)              | 25(55.6)                         | 90(67.2)                         |                |
| Concomitant CIS             | Present      | 32(11.6)               | 8(17.8)                          | 25(18.7)                         | 0.8938         |
|                             | Absent       | 147(88.4)              | 37(82.2)                         | 109(81.3)                        |                |

**Table S2.** non-BCG treated patients subdivided according to the presence of preoperative pyuria.

|                             |              | <b>Total<br/>n=245</b> | <b>Pyuria present<br/>(n=38)</b> | <b>Pyuria absent<br/>(n=207)</b> | <b>P-value</b> |
|-----------------------------|--------------|------------------------|----------------------------------|----------------------------------|----------------|
| Age                         | Mean (range) | 72(39-94)              | 71(50-90)                        | 75(39-94)                        | 0.3462         |
| Sex                         | Male         | 195(79.6)              | 23(60.5)                         | 172(83.1)                        | 0.0015         |
|                             | Female       | 50(20.4)               | 15(39.5)                         | 35(16.9)                         |                |
| Preoperative cytology       | Positive     | 217(88.6)              | 3(7.9)                           | 25(12.1)                         | 0.4563         |
|                             | Negative     | 28(21.4)               | 35(92.1)                         | 182(87.9)                        |                |
| Grade                       | High         | 165(67.3)              | 30(78.9)                         | 135(65.2)                        | 0.0971         |
|                             | Low          | 80(32.7)               | 8(21.1)                          | 72(34.8)                         |                |
| Pathological T stage, n (%) | T1           | 45(18.4)               | 12(31.6)                         | 33(15.9)                         | 0.0221         |
|                             | Others       | 200(81.6)              | 26(68.4)                         | 174(84.1)                        |                |
| Concomitant CIS             | Present      | 15(6.1)                | 1(2.6)                           | 15(7.2)                          | 0.2899         |
|                             | Absent       | 230(38.8)              | 37(97.4)                         | 192(92.8)                        |                |

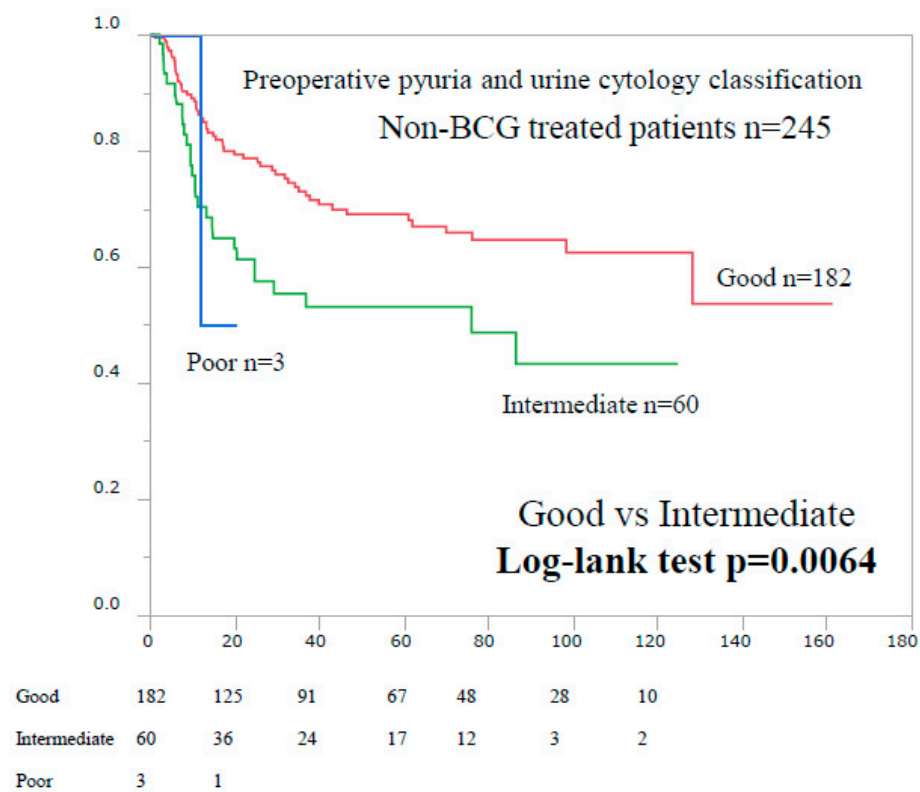

**Figure S1.** Intravesical recurrence-free survival rates after trans-urethral resection of bladder tumors in non-BCG treated patients according to preoperative pyuria and cytology status. Low risk: cytology (-) and pyuria (-); intermediate risk: cytology (+) and pyuria (-)/cytology (-) and pyuria (+); high risk: cytology (+) and pyuria (+). Rates were estimated using the Kaplan-Meier method.
